# Supplementary material for: Increases in the Macrolide Resistance of Mycoplasma genitalium and the Emergence of the A2058T Mutation in the 23S rRNA Gene: Clonal Spread?
Source: MDPI journal article supplement (doi:10.3390/antibiotics11111492), 2022-10-27
Supplement: s1 [file s1]

Supplementary Figure S1. Phylogenetic analysis of the MG191 locus of the adhesion gene (281 bp) in the 27 strains of *Mycoplasma genitalium* with A2058T mutations in the 23S rRNA gene detected in Gipuzkoa (2014-2021). Sequences are represented by the case number. The tree was constructed in BioEdit and MEGA 7 software, using the neighbour-joining method with 1000 bootstrap replications. The column on the right of the tree lists the genotypes identified using the MultAlin and BLAST programs (238-241 being new genotypes not previously described).

\* *M. genitalium* G37 (GenBank accession number L43967) was used as the reference strain.

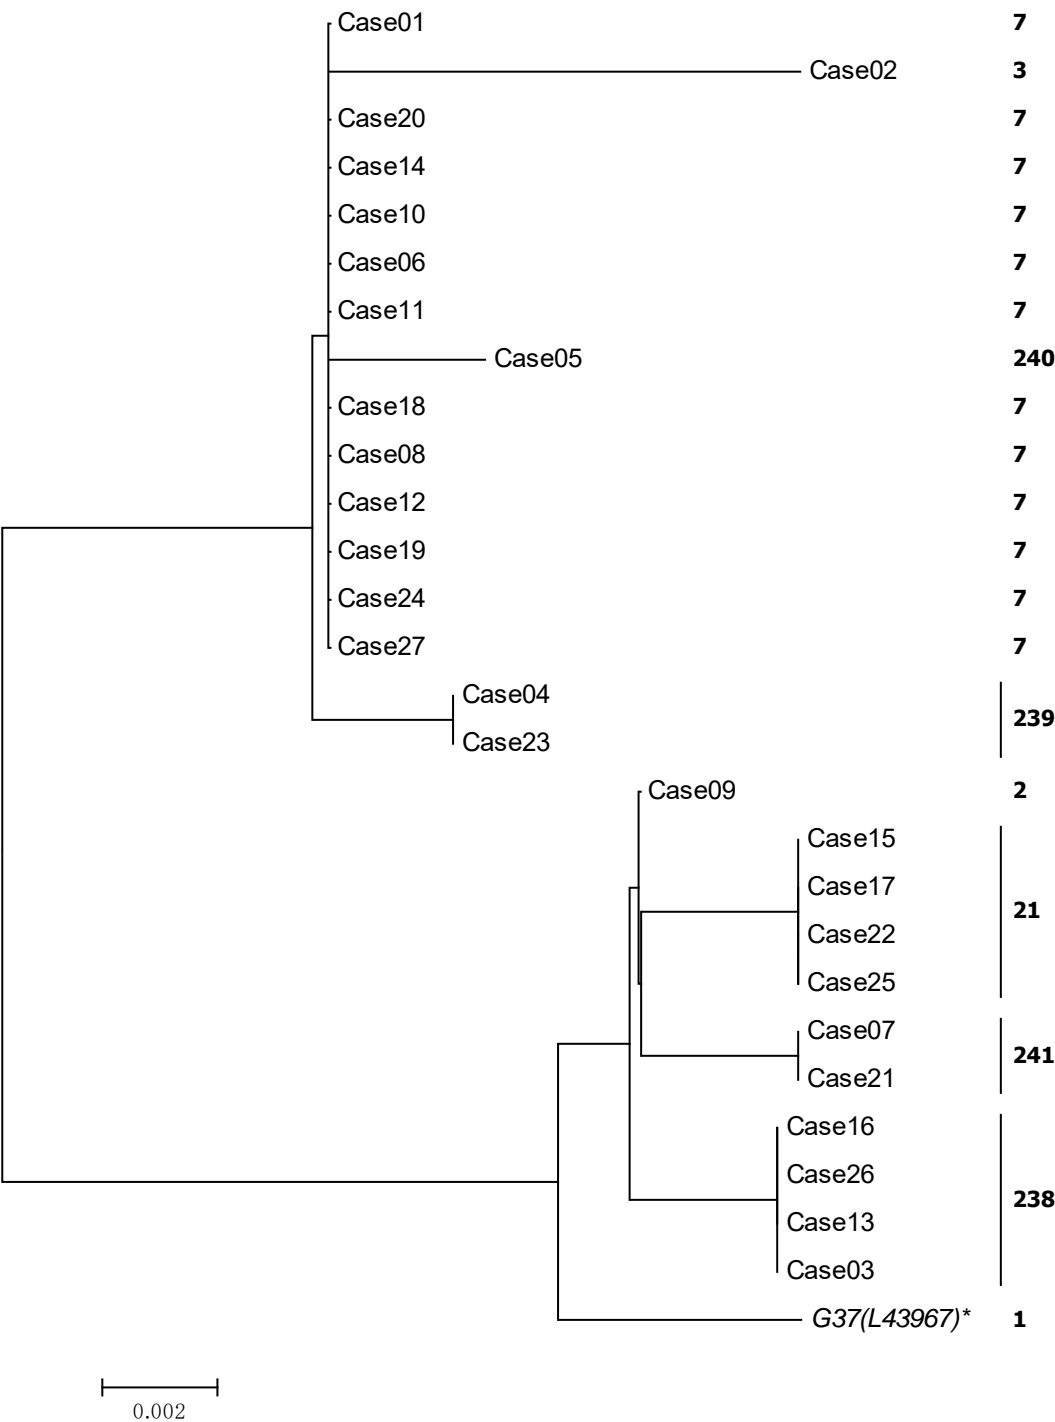

Supplementary Figure S2. Analysis of the number of tandem repeats in the MG309 locus of the lipoprotein gene in the 27 strains of *Mycoplasma genitalium* with A2058T mutations in the 23S rRNA gene detected in Gipuzkoa (2014-2021). The nucleotide alignment includes a small fragment of the amplified region (~350 bp), corresponding to the reference strain of *M. genitalium* G37 (GenBank accession number L43967\*) between nucleotides 1,714 and 1,767 (the first and the last 9 nucleotides, in yellow). The region inside the square represents the triplet repeats (ACT, in green; ATT, in blue). The crosses (in grey) indicate the gaps introduced to optimise the alignment.

Supplementary Table S1. Designation of new *Mycoplasma genitalium* MG191 types (238-241) based on previously described types (reference 31) and FASTA sequences. All the strains were aligned from a common start to a common end, corresponding to nucleotides 221749 - 222029 of the *Mycoplasma genitalium* reference strain G37 (accession number L43967).

Type 1: G37 (L43967)

```
AGTTGATGAAACCTTAACCCCTTGGACTTGAAACAATAACAACCTTCTCTTCACTAAAGA
TTACTGGAGAGAACCCAGGATCATTTGGATTAGTAAGAAGCCAAAATGACAACCTTAAA
TATTTCAAGTGTTACAAAGAATTCTAGTGATGATAATCTCAAGTATCTCAATGCTGTTG
AGAAATACCTTGATGGTCAGCAAAACTTTGCAATCAGAAGGTATGATAACAACGGTAG
AGCTTTATATGATATTAACCTTAGCAAAAATGGAAAACCCCTCAACGG
```

Type 238 (cases 3, 13, 16 and 26): GenBank accession number ON933572

```
AGTTGATGAAACCTTAACCCCTTGGACTTGAAACAATAACAACCTTCTCTTCACTAAAGA
TTACTGGAGAGAACCCAGGATCATTTGGATTAGTAAGAAGCCAAAATGACAACCTTAAA
TATTTCAAGTGTTACAAAGAATGTTAGTGATGATAATCTCAAGTATCTCAATGTTGTTG
AGAAATACCTTGATGGTCAGCAAAACTTTGCAATCAGAAGGTATGATAACAACGGTAG
AGCTTTATATGATATTAACCTTAGCAAAAATGGAAAACCCCTCAACGG
```

Type 239 (cases 4 and 23): GenBank accession number ON933573

```
AGTTGATGAAACCTTAACCCCTTGGACTTGAAACAATAACAACCTTCTCTTCACTAAAGA
TTACTGGAGAGAACCCAGGATCATTTGGACTAGTAAGAAGCCAAAATGAGAACTTAAA
CATCGCAAGTGTTACAAAGAATGGTAGTGATGATAATCTCAAGTATCTCAATGATGTT
GAGAAATACCTTGATGGTCAGCAAAACTTTGCAATCAGAAGGTATGATAACAACGGTA
GAGCTTTATATGATATTAACCTTAGCAAAAATGGAAAACCCCTCAACGG
```

Type 240 (case 5): GenBank accession number ON933574

```
AGTTGATGAAACCTTAACCCCTTGGACTTGAAACAATAACAACCTTCTCTTCACTAAAGA
TTACTGGAGAGAACCCAGGATCATTTGGACTAGTAAGAAGCCAAAATGAGAACTTAAA
CATCGCAAGTGTTACAAAGAATGGTAGTGATGATAATCTCGAGTATCTCAATGCTGTTG
AGAAATACCTTGATGGTCAGCAAAACTTTGCAATCAGAAGGTATGATAACAACGGTAG
AGCTTTATATGATATTAACCTTAGCAAAAATGGAAAACCCCTCAACGG
```

Type 241 (cases 7 and 21): GenBank accession number ON933575

```
AGTTGATGAAACCTTAACCCCTTGGACTTGAAACAATAACAACCTTCTCTTCACTAAAGA
TTACTGGAGAGAACCCAGGATCATTTGGATTAGTAAGAAGCCAAAATGACAACCTTAAA
TATTTCAAGTGTTACAAAGAATGTTAGTGGTGATAATCTCAAGTATCTCAATGCTGTTG
AGAAATACCTTGATGGTCAGCAAAACTTTGCAATCAGAAGGTATGATAACAACGGTAG
AGCTTTATATGATATTAACCTTAGCAAAAATGGAAAACCCCTCAACGG
```

Reference 31: Dumke R. Molecular Tools for Typing *Mycoplasma pneumoniae* and *Mycoplasma genitalium*. Front. Microbiol. 13:904494, doi: 10.3389/fmicb.2022.904494.
